# Supplementary material for: Vacancy formation mechanism and synergy with doping in NiS 2 -based electrocatalysts for benzyl alcohol oxidation and hydrogen evolution
Source: Royal Society of Chemistry journal article supplement (doi:10.1039/d4qi03098b), 2024-12-31
Supplement: d4qi03098b1.pdf [file d4qi03098b1.pdf]

**Vacancy formation mechanism and synergy with doping in NiS<sub>2</sub>-based electrocatalyst for benzyl alcohol oxidation and hydrogen evolution**

*Fang Li<sup>a</sup>, Haili Lin<sup>a</sup>, Huiqin Yu<sup>a</sup>, Pengfei Du<sup>a</sup>, Yang Wang<sup>b,\*</sup>, Jing Cao<sup>a,\*</sup>*

<sup>a</sup>Key Laboratory of Green and Precise Synthetic Chemistry and Applications,  
Ministry of Education; College of Chemistry and Materials Science, Huaibei Normal  
University, Huaibei, Anhui 235000, P. R. China

<sup>b</sup>Department of Applied Biology and Chemical Technology and Research Institute for  
Smart Energy, The Hong Kong Polytechnic University, Kowloon, Hong Kong SAR,  
P. R. China

## Content

|                                                                                |    |
|--------------------------------------------------------------------------------|----|
| <b>Fig. S1</b> XRD pattern of Ni MOF                                           | 3  |
| <b>Fig. S2</b> the SEM of the MOF                                              | 3  |
| <b>Fig. S3</b> nitrogen adsorption-desorption isotherm                         | 3  |
| <b>Fig. S4</b> the C 1s XPS                                                    | 4  |
| <b>Fig. S5</b> the $C_{dl}$ for the BA oxidation                               | 5  |
| <b>Fig. S6</b> the HPLC results of BA                                          | 6  |
| <b>Fig. S7</b> the HPLC results of benzaldehyde                                | 6  |
| <b>Fig. S8</b> CV curves                                                       | 7  |
| <b>Fig. S9</b> the $C_{dl}$ for the HER                                        | 7  |
| <b>Fig. S10</b> the stability of the pristine $NiS_2$                          | 8  |
| <b>Fig. S11</b> the XRD of the $S_{vac}$ -P- $NiS_2$ after long term catalysis | 8  |
| <b>Fig. S12</b> the SEM of the $S_{vac}$ -P- $NiS_2$ after long term catalysis | 9  |
| <b>Fig. S13</b> the optimized structure                                        | 10 |
| <b>Calculation method</b>                                                      | 10 |
| <b>Table S1</b> the comparison of the BA oxidation                             | 12 |
| <b>Table S2</b> the EIS fitting results for BA oxidation                       | 14 |
| <b>Table S3</b> the EIS fitting results for HER                                | 14 |

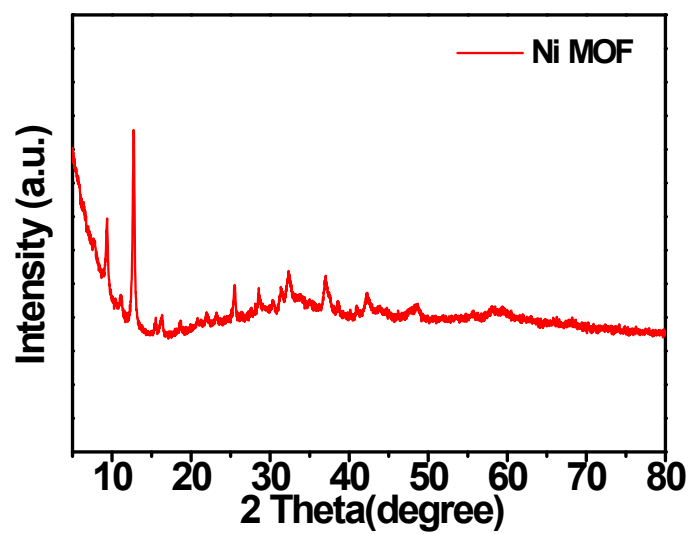

Fig. S1. XRD pattern of Ni MOF

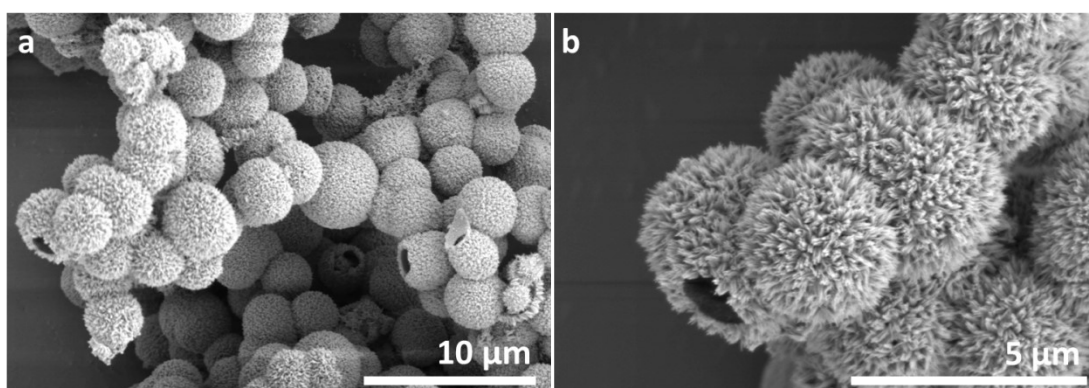

Fig. S2. the SEM of the MOF

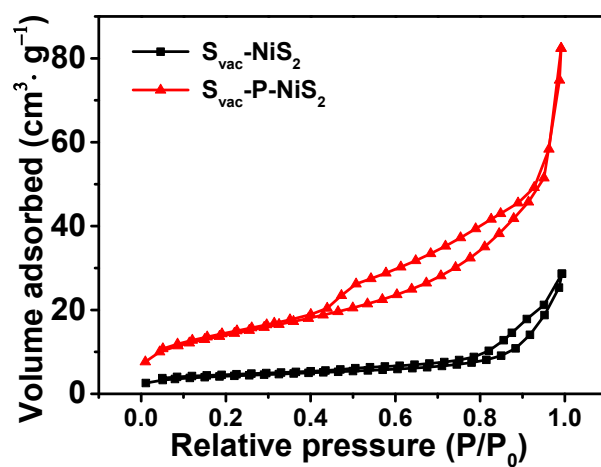

Fig. S3. Nitrogen adsorption-desorption isotherm of the  $S_{vac}$ -P-NiS<sub>2</sub> and  $S_{vac}$ -NiS<sub>2</sub>

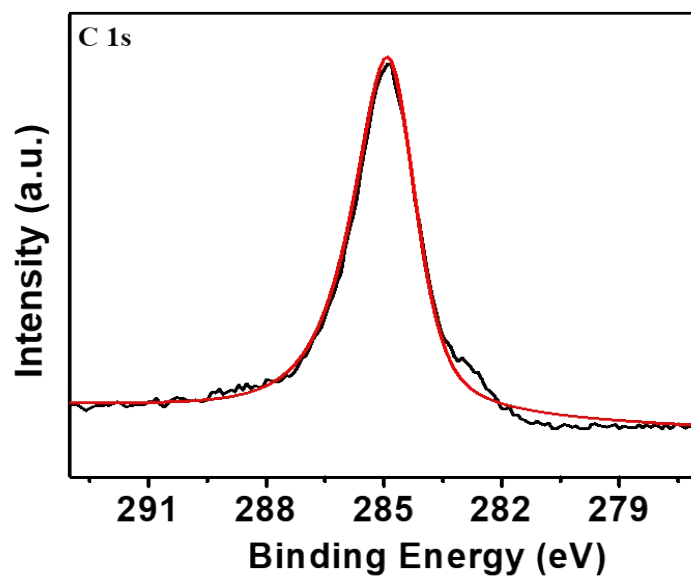

Fig. S4. the C 1s XPS of the  $S_{\text{vac}}\text{-P-NiS}_2$

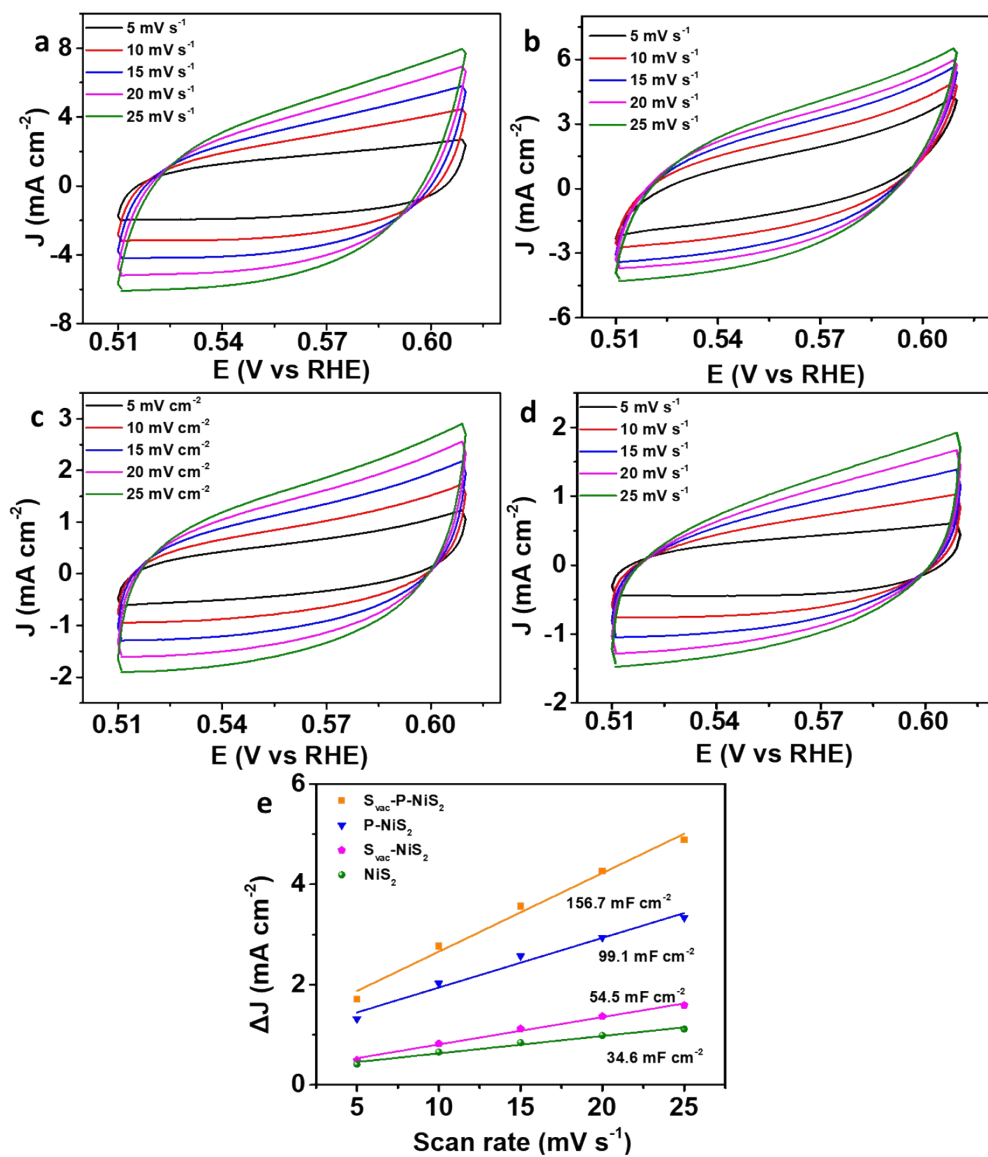

**Fig. S5.** The  $C_{\text{dl}}$  of  $S_{\text{vac}}\text{-P-NiS}_2$ ,  $\text{P-NiS}_2$ ,  $S_{\text{vac}}\text{-NiS}_2$ , and  $\text{NiS}_2$  for the BA oxidation.

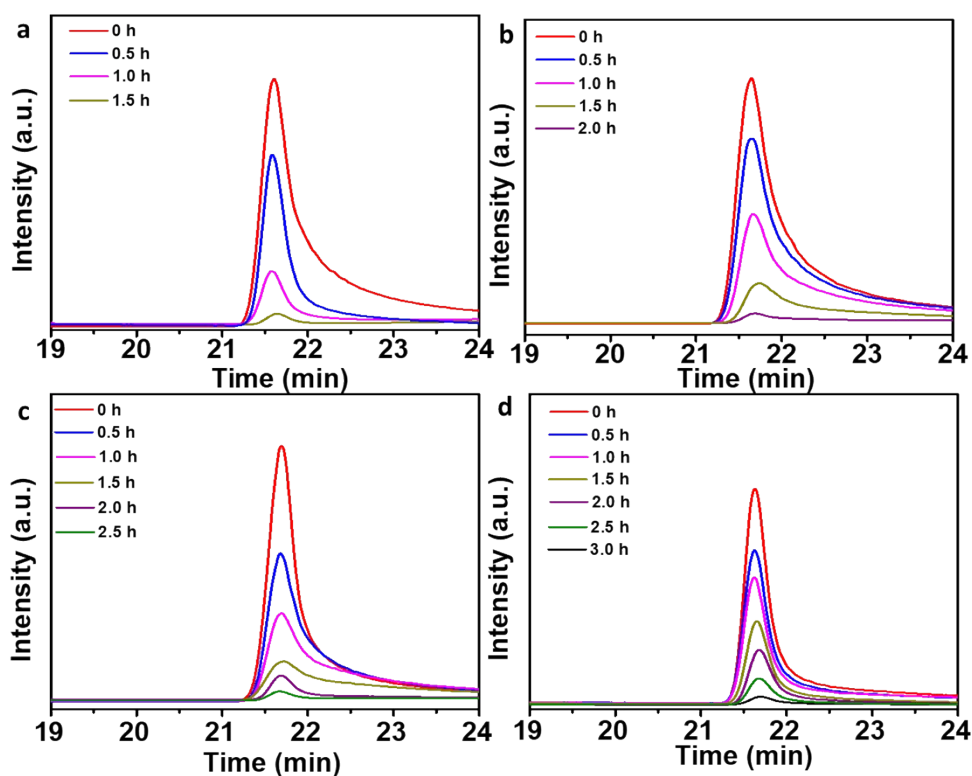

Fig. S6. The HPLC results of benzyl alcohol for (a)  $S_{vac}$ -P-NiS<sub>2</sub>, (b) P-NiS<sub>2</sub>, (c)  $S_{vac}$ -NiS<sub>2</sub>, (d) NiS<sub>2</sub>.

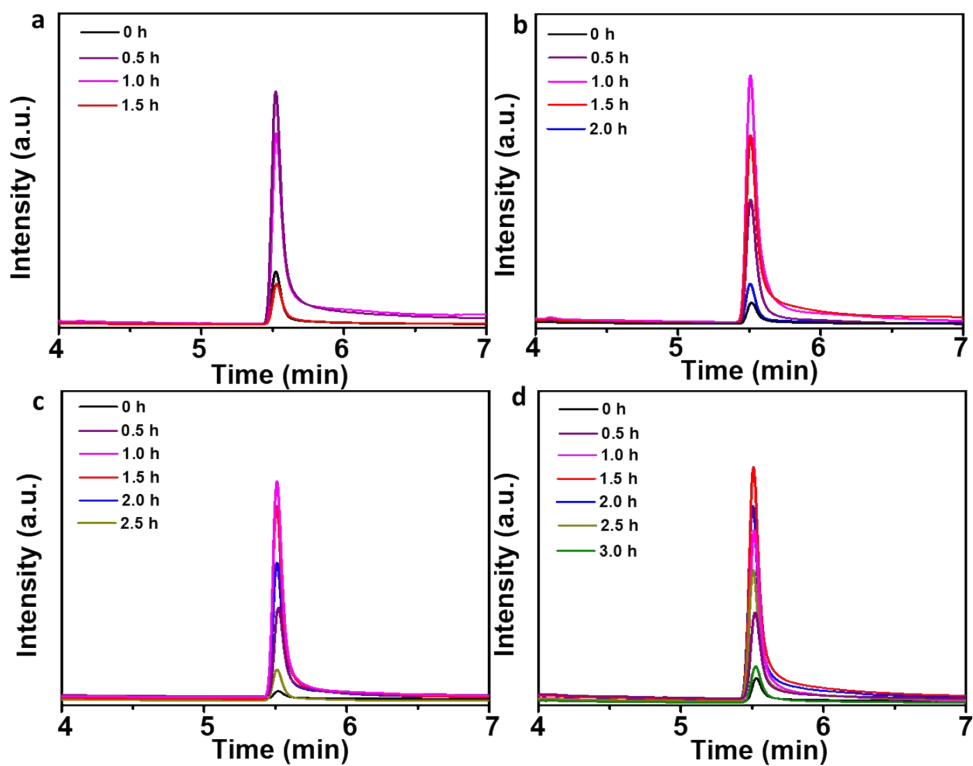

Fig. S7. The HPLC results of benzaldehyde for (a)  $S_{vac}$ -P-NiS<sub>2</sub>, (b) P-NiS<sub>2</sub>, (c)  $S_{vac}$ -NiS<sub>2</sub>, (d) NiS<sub>2</sub>.

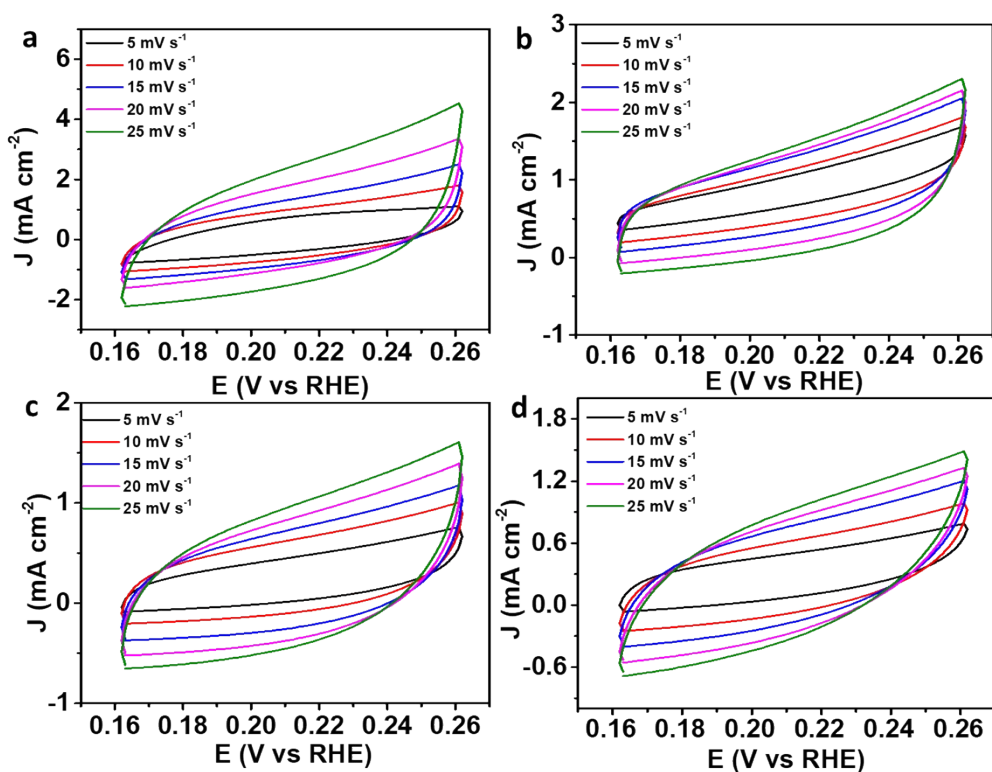

**Fig. S8.** CV curves measured at different scan rates (5, 10, 15, 20, 25 mV s<sup>-1</sup>). (a) S<sub>vac</sub>-P-NiS<sub>2</sub>, (b) P-NiS<sub>2</sub>, (c) S<sub>vac</sub>-NiS<sub>2</sub>, (d) NiS<sub>2</sub>. For the HER

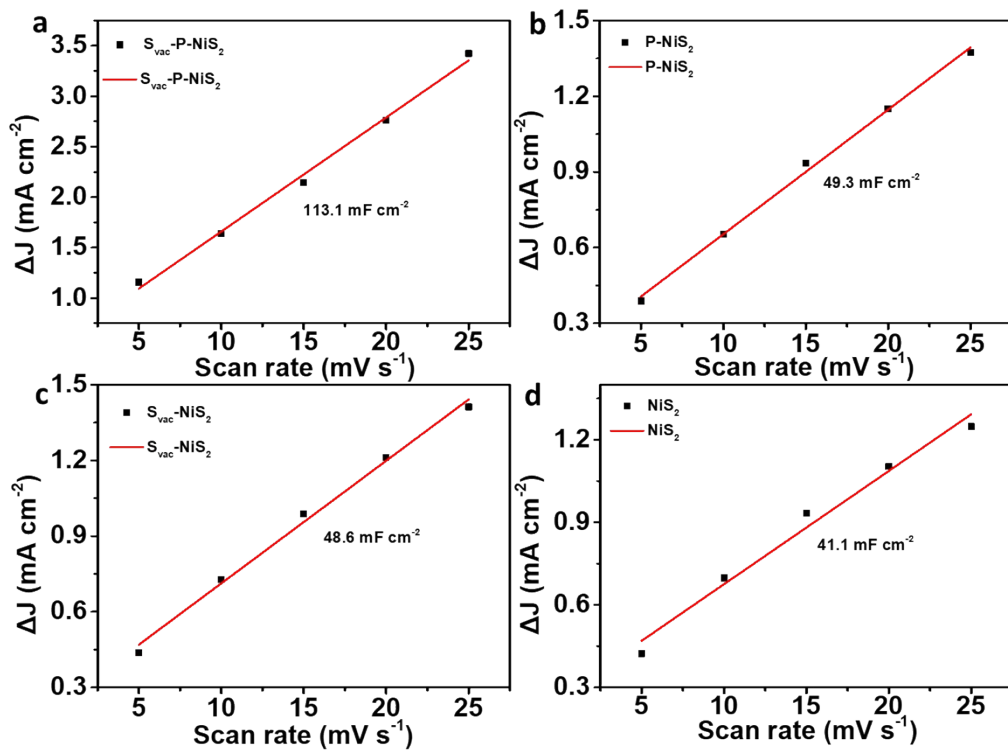

**Fig. S9.** The  $C_{dl}$  of (a) S<sub>vac</sub>-P-NiS<sub>2</sub>, (b) P-NiS<sub>2</sub>, (c) S<sub>vac</sub>-NiS<sub>2</sub>, (d) NiS<sub>2</sub>. For the HER

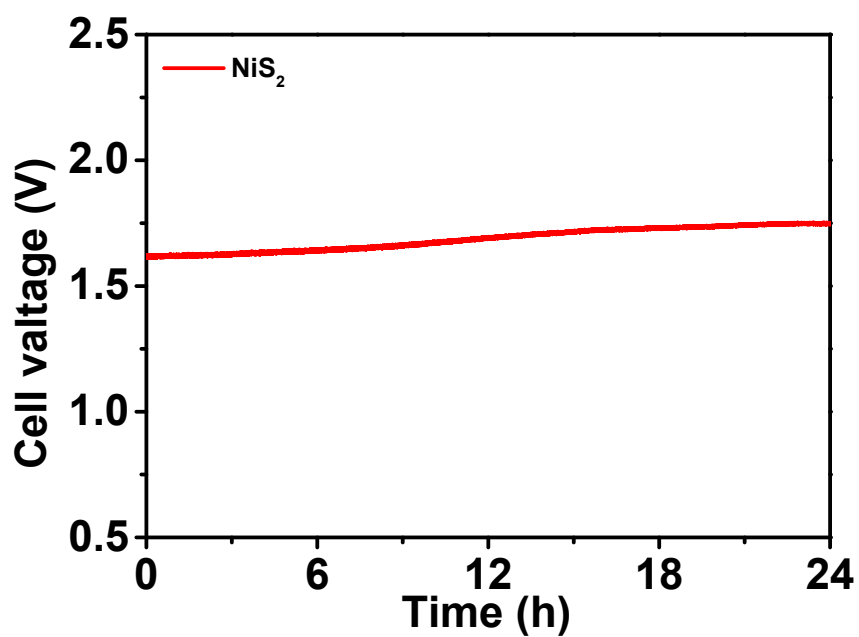

Fig. S10 the stability of the pristine  $\text{NiS}_2$

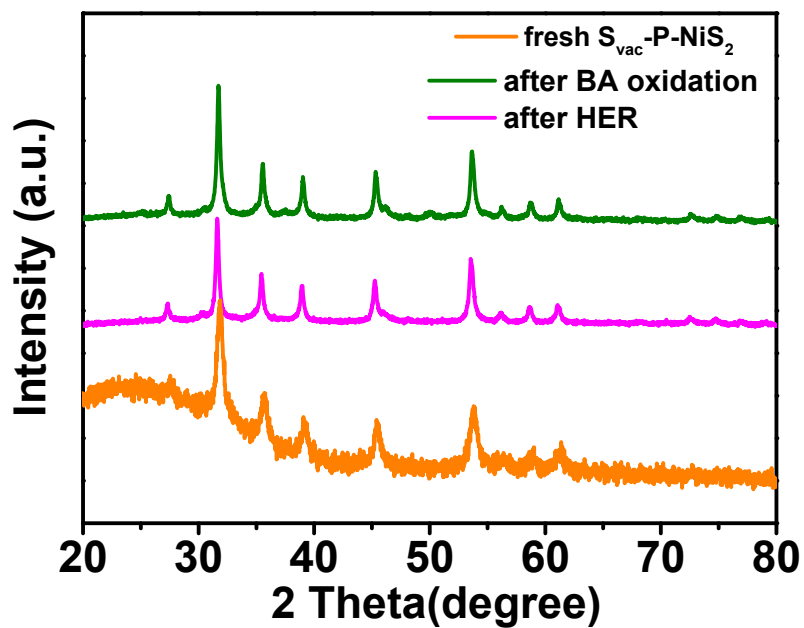

Fig. S11 The XRD after long term BA oxidation and HER for the  $\text{S}_{\text{vac}}\text{-P-NiS}_2$



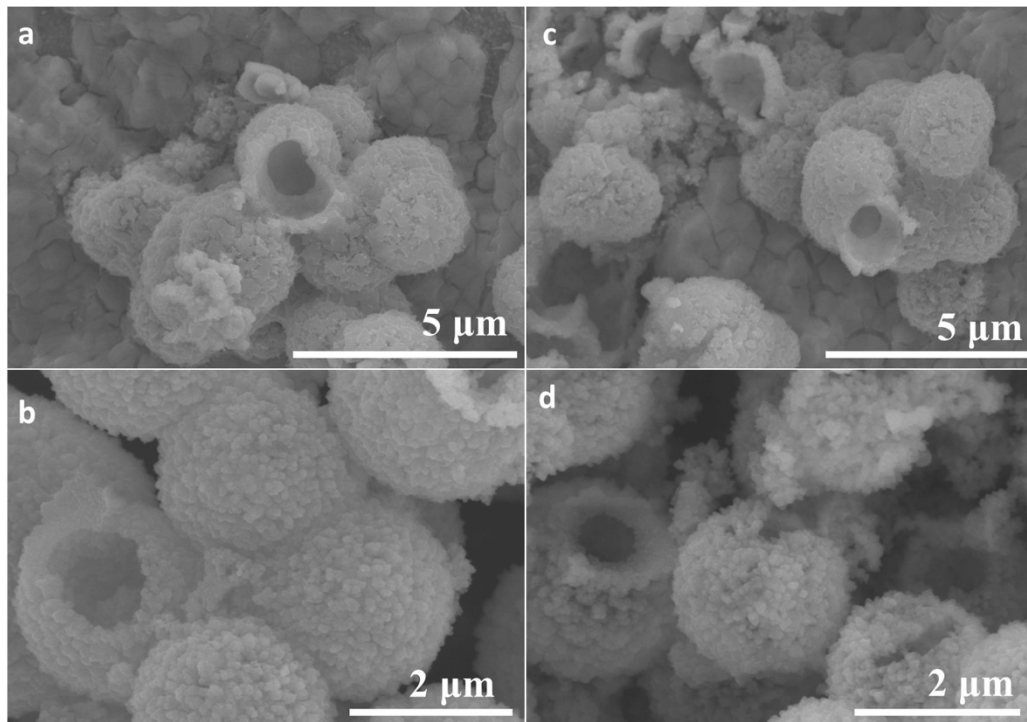

**Fig. S12.** the SEM of the after long term BA oxidation (a and b) and HER (c and d)

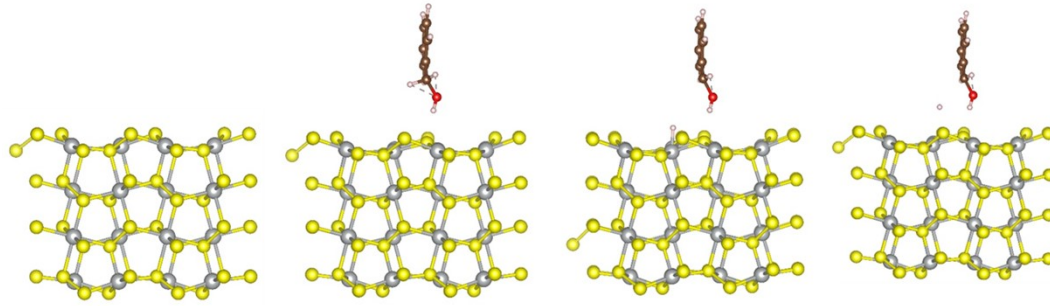

(a) The optimized structure of the NiS<sub>2</sub>

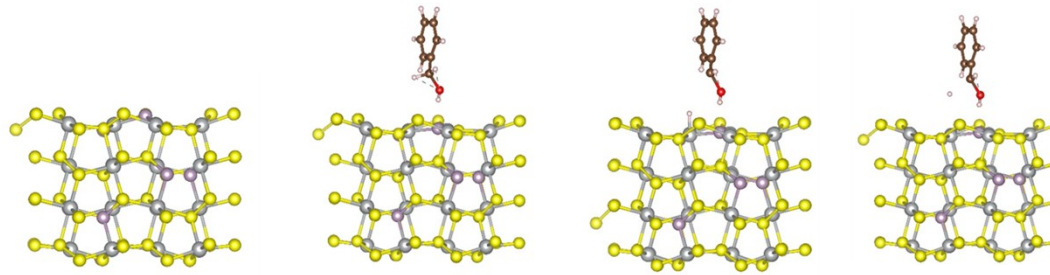

(b) The optimized structure of the P-NiS<sub>2</sub>

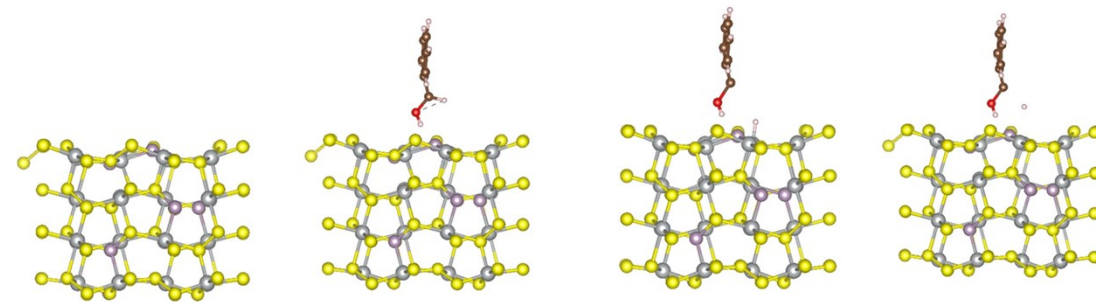

(c) The optimized structure of the S<sub>vac</sub>-P-NiS<sub>2</sub>

**Fig. S13.** the optimized structure

### Calculation method

All the DFT calculations were conducted based on the Vienna Ab-initio Simulation Package (VASP). The exchange-correlation effects were described by the Perdew-Burke-Ernzerhof (PBE) functional within the generalized gradient approximation (GGA) method. The core-valence interactions were accounted by the projected augmented wave (PAW) method. The energy cutoff for plane wave expansions was set to 480 eV, and the  $3 \times 3 \times 1$  Monkhorst-Pack grid k-points were selected to sample the

Brillouin zone integration. The vacuum space is adopted 15 Å above the surfaces to avoid periodic interactions. The structural optimization was completed for energy and force convergence set at  $1.0 \times 10^{-4}$  eV and  $0.02$  eV Å<sup>-1</sup>, respectively.

The Gibbs free energy change ( $\Delta G$ ) of each step is calculated using the formula:  $\Delta G = \Delta E + \Delta ZPE - T\Delta S$ , where  $\Delta E$  is the electronic energy difference directly obtained from DFT calculations,  $\Delta ZPE$  is the zero point energy difference,  $T$  is the room temperature (298.15 K) and  $\Delta S$  is the entropy change. ZPE could be obtained after

frequency calculation by:  $ZPE = \frac{1}{2} \sum h\nu_i$

And the  $T\Delta S$  values are calculated according to the vibrational frequencies:

$$T\Delta S = k_B T \left[ \sum_k \ln \left( \frac{1}{1 - e^{-h\nu/k_B T}} \right) + \sum_k \frac{h\nu}{k_B T} \frac{1}{(e^{h\nu/k_B T} - 1)} + 1 \right]$$

**Table S1** the comparison of the BA oxidation

| Catalysts                                 | Electrolyte<br>(1 M KOH with BA) | Product      | E (V vs. RHE) | Current density (mA cm <sup>-2</sup> ) | Ref.      |
|-------------------------------------------|----------------------------------|--------------|---------------|----------------------------------------|-----------|
| S <sub>vac</sub> -P-NiS <sub>2</sub>      | 50 mM                            | Benzoic acid | 1.21          | 50                                     | This work |
| CC@NiO/Ni <sub>3</sub> S <sub>2</sub>     | 0.2 M                            | Benzoic acid | 1.365         | 50                                     | 1         |
| Hp-Ni                                     | 10 mM                            | Benzoic acid | 1.35          | 10                                     | 2         |
| NC@CuCo <sub>2</sub> N <sub>x</sub> /CF   | 15 mM                            | Benzoic acid | 1.25          | 10                                     | 3         |
| Mo-Ni                                     | 10 mM                            | Benzoic acid | 1.345         | 15                                     | 4         |
| N-Mo-Ni/NF                                | 0.1 M                            | Benzaldehyde | 1.338         | 100                                    | 5         |
| Co <sub>0.83</sub> Ni <sub>0.17</sub> /AC | 10 mM                            | Benzoic acid | 1.28          | 10                                     | 6         |
| h-Ni(OH) <sub>2</sub>                     | 40 mM                            | Benzoic acid | 1.43          | 20                                     | 7         |
| Fe/Co(oxide)                              | 15 mM                            | Benzoic acid | 1.438         | 10                                     | 8         |
| NiCo <sub>2</sub> O <sub>4</sub> /NF      | 50 mM                            | Benzoic acid | 1.46          | 100                                    | 9         |
| MnFeCoNiCu                                | 0.1 M                            | Benzoic acid | 1.57          | 100                                    | 10        |
| Ni <sub>2</sub> P                         | 50 mM                            | Benzoic acid | 1.32          | 30                                     | 11        |
| Ni <sub>x</sub> Co <sub>1-x</sub> -HCF HN | 0.1 M                            | Benzoic acid | 1.33          | 10                                     | 12        |

1 R.C. Li, P.Y. Kuang, L.X Wang, H.L. Tang, J.G. Yu, Engineering 2D NiO/Ni<sub>3</sub>S<sub>2</sub> heterointerface electrocatalyst for highly efficient hydrogen production coupled with benzyl alcohol oxidation, *Chem Eng J.*, 2022, **431**, 134137.

2 B. You, X. Liu, X. Liu, Y.J. Sun, Efficient H<sub>2</sub> evolution coupled with oxidative refining of alcohols via a hierarchically porous nickel bifunctional electrocatalyst, *ACS Catal.*, 2017, **7** (7), 4564–4570.

3 J. Zheng, X.L. Chen, X. Zhong, S.Q. Li, T.Z. Liu, G.L Zhuang, X.N. Li, S.W. Deng, D.H. Mei, J.G. Wang, Hierarchical porous NC@CuCo nitride nanosheet networks: highly efficient bifunctional electrocatalyst for overall water splitting and selective electrooxidation of benzyl alcohol, *Adv. Mater.*, 2017, 1704169.

4 X. Liu, X. Cui, M. Chen, R. Xiong, J. Sun and B. Geng, Ultrastable and efficient H<sub>2</sub> production via membrane-free hybrid water electrolysis over a bifunctional catalyst of hierarchical Mo-Ni alloy nanoparticles, *J. Mater. Chem. A.*, 2019, **7**, 16501–16507.

5 J. Wan, X. Mu, Y. Jin, J.K. Zhu, Y.C. Xiong, T.Y. Li, R. Li, Nitrogen-doped nickel-molybdenum oxide as a highly efficient electrocatalyst for benzyl alcohol Oxidation, *Green Chem.*, 2022, **24**, 4870–4876.

- 6 G.Q. Liu, X. Zhang, C.J. Zhao, Q.Z. Xiong, W.B. Gong, G.Z. Wang, Y.X. Zhang, H.M. Zhang, H.J. Zhao, Correction: electrocatalytic oxidation of benzyl alcohol for simultaneously promoting H<sub>2</sub> evolution by a Co<sub>0.83</sub>Ni<sub>0.17</sub>/activated carbon electrocatalyst, *New. J. Chem.*, 2019, **43**, 7881.
- 7 X.L. Chen, X. Zhong, B.W. Yuan, S.Q. Li, Y.B. Gu, Q.Q. Zhang, G.L. Zhuang, X.N. Li, S.W. Deng, J.W. Wang, Defect engineering of nickel hydroxide nanosheets by ostwald ripening for enhanced selective electrocatalytic alcohol oxidation, *Green Chem.*, 2019, **21**, 578-588.
- 8 Y.Y. Huang, R. Yang, G. Anandhababu, J.F. Xie, J.Q. Lv, X.T. Zhao, X.Y. Wang, M.X. Wu, Q.H. Li, Y.B. Wang, Cobalt/Iron (oxides) heterostructures for efficient oxygen evolution and benzyl alcohol oxidation reactions, *ACS Energy Lett.*, 2018, **3**, 1854–1860.
- 9 M. Xu, J. Geng, H. Xu, S. Zhang, H. Zhang, In situ construction of NiCo<sub>2</sub>O<sub>4</sub> nanosheets on nickel foam for efficient electrocatalytic oxidation of benzyl alcohol, *Inorg Chem Front.*, 2023, **10** (7), 2053–2059.
- 10 B. Singh, R. Kumar, A. Draksharapu, Multimetallic prussian blue analogue nanoparticles for oxygen evolution reaction and efficient benzyl alcohol oxidation, *ACS Applied Nano Mater.*, 2024, **7** (13), 15763–15771.
- 11 F. Li, C. Liu, H. Lin, Y. Sun, H.Q. Yu, X.M. Jia, S. Xue, J. Cao, S.F. Chen, High activity of bifunctional Ni<sub>2</sub>P electrocatalyst for benzyl alcohol oxidation coupled with hydrogen evolution, *J. Colloid Interface Sci.*, 2023, **640**, 329–337.
- 12 C. Lv, L. Chen, J. Bai, H. Ruo, Y. Pan, S. Xu, J. Chen, D. Zhang, C. Guo, Ni-Co hexacyanoferrate hollow nanoprism with CN vacancy for electrocatalytic benzyl alcohol oxidation. *Chem Commun.*, 2024, **60** (46), 5952–5955.

**Table S2** EIS fitting results for BA oxidation.

|          | S <sub>vac</sub> -P-NiS <sub>2</sub> | P-NiS <sub>2</sub> | S <sub>vac</sub> -NiS <sub>2</sub> | NiS <sub>2</sub> |
|----------|--------------------------------------|--------------------|------------------------------------|------------------|
| Rs       | 2.541                                | 2.856              | 2.978                              | 2.739            |
| Rct      | 10.29                                | 13.99              | 16.49                              | 29.78            |
| CPE-T    | 0.00026369                           | 0.00017668         | 0.00019744                         | 0.00012944       |
| CPE-P    | 0.73101                              | 0.7932             | 0.7267                             | 0.83402          |
| $\chi^2$ | 0.071193                             | 0.079766           | 0.062145                           | 0.058712         |

**Table S3** EIS fitting results for HER.

|          | S <sub>vac</sub> -P-NiS <sub>2</sub> | P-NiS <sub>2</sub> | S <sub>vac</sub> -NiS <sub>2</sub> | NiS <sub>2</sub> |
|----------|--------------------------------------|--------------------|------------------------------------|------------------|
| Rs       | 2.752                                | 2.86               | 2.752                              | 2.755            |
| Rct      | 11.78                                | 11.72              | 11.78                              | 30.93            |
| CPE-T    | 0.00016389                           | 0.0003318          | 0.00016389                         | 0.00012495       |
| CPE-P    | 0.7943                               | 0.70396            | 0.7943                             | 0.83894          |
| $\chi^2$ | 0.048664                             | 0.076587           | 0.048664                           | 0.059591         |
